# Supplementary figures and images for: Systematic review and subgroup analysis of the incidence of acute kidney injury (AKI) in patients with COVID-19
Source: Research Square preprint supplement (doi:10.21203/rs.3.rs-52615/v3), 2021-01-20

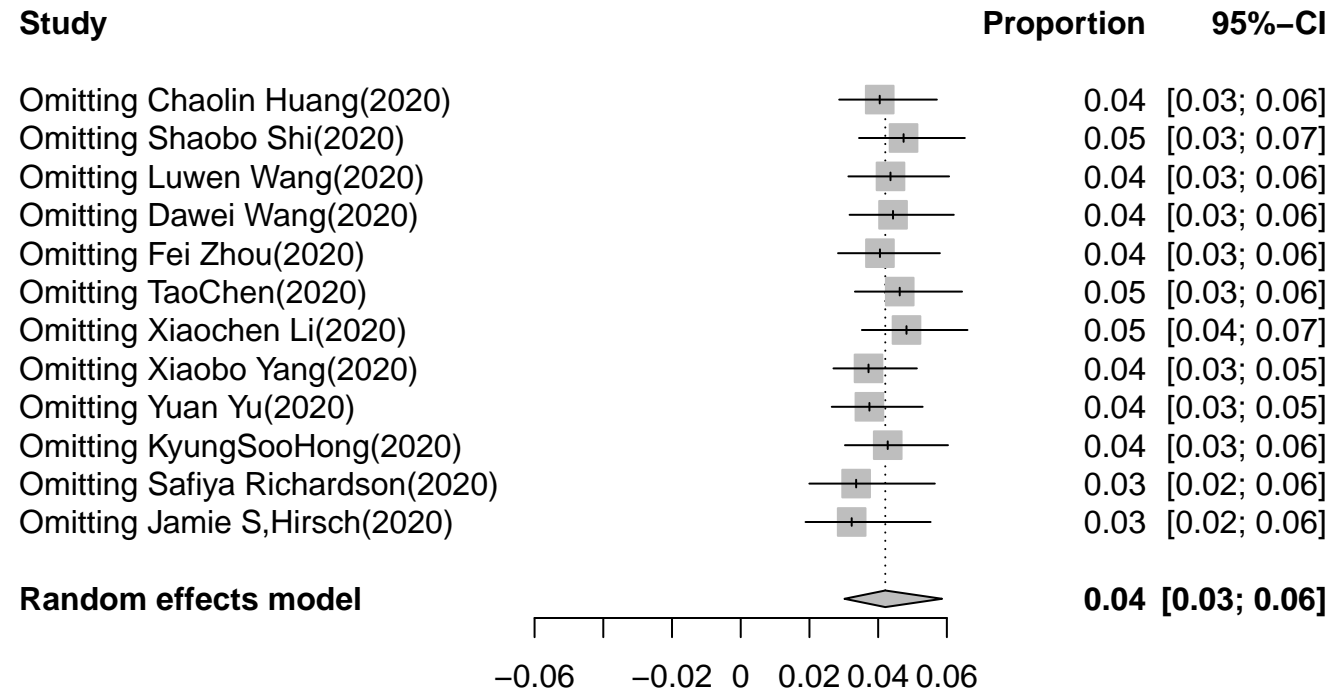

Supplement: Supplementary file 1 [file 3593ec84426272b523bf6d17.pdf]

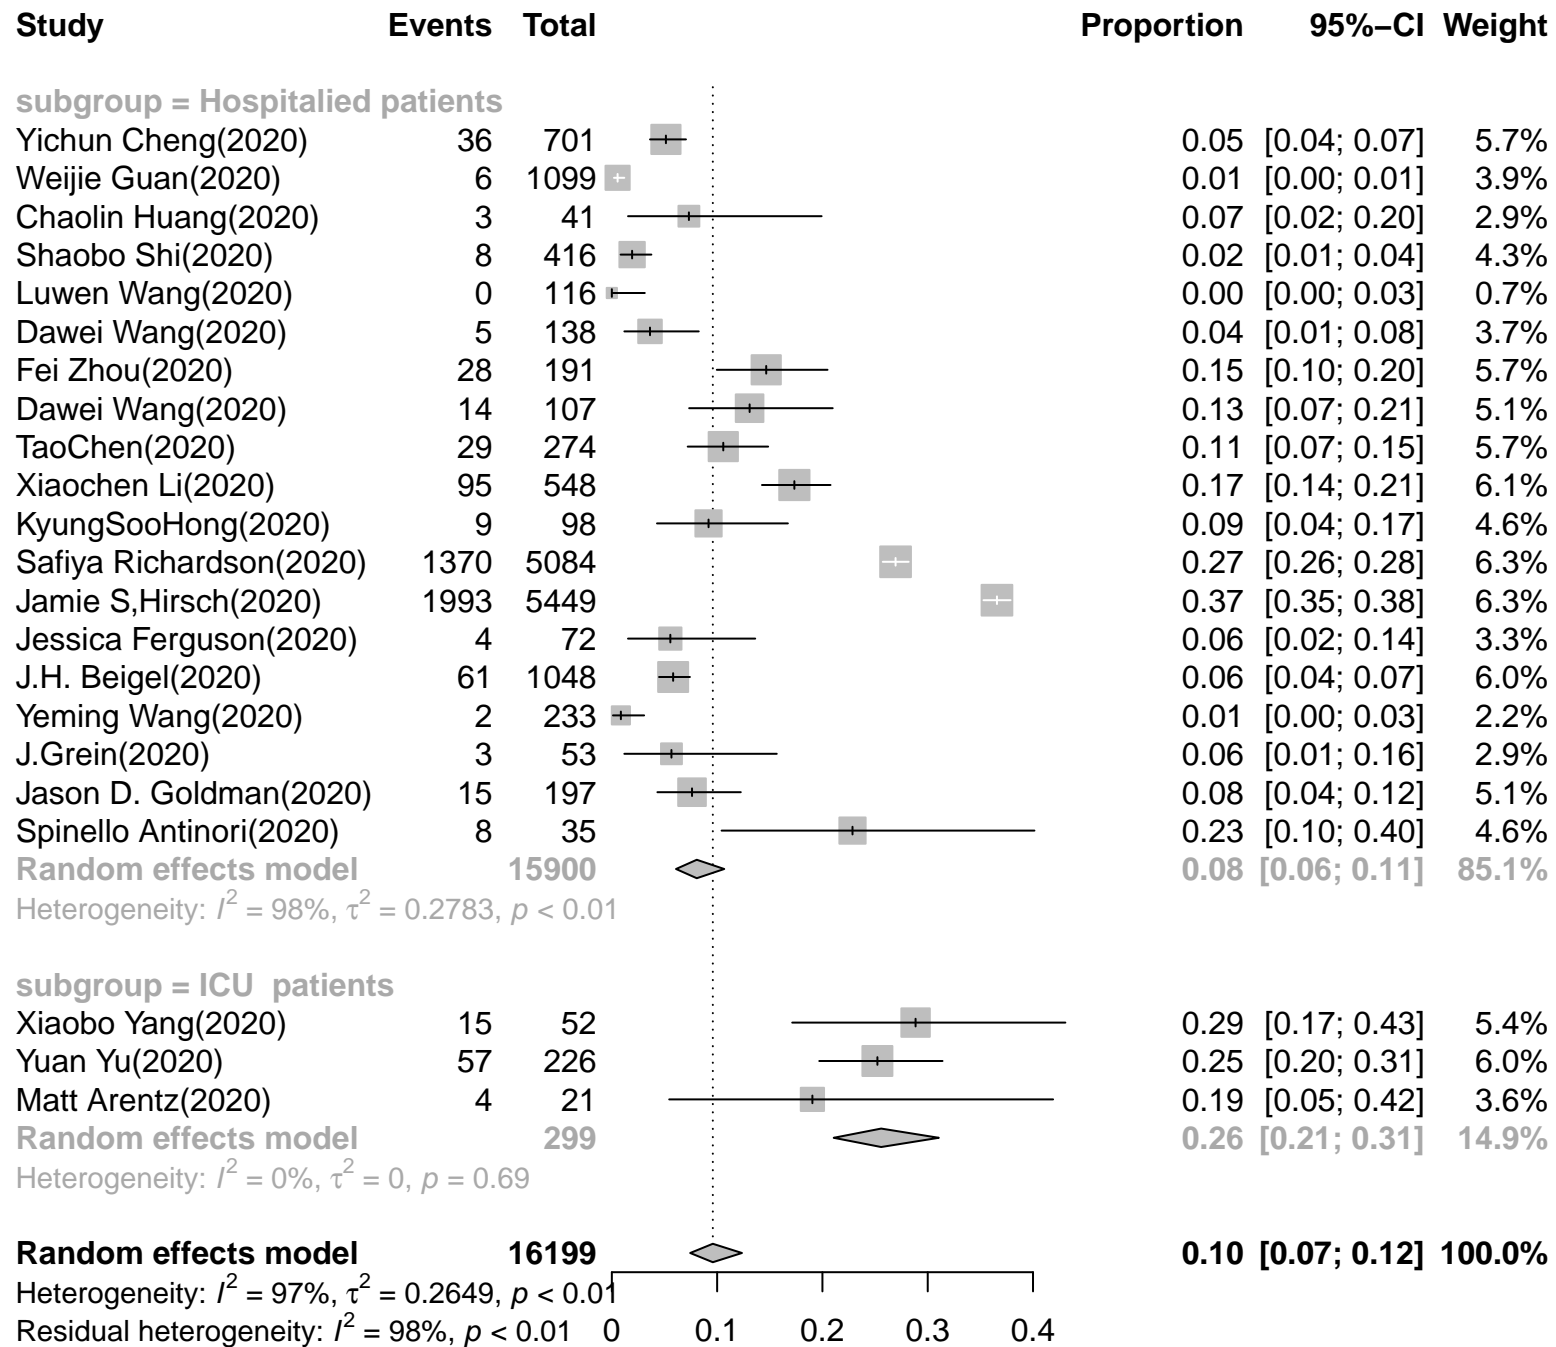

Supplement: Supplementary file 2 [file 5025218f7cec806a484287bb.pdf]
